# Supplementary material
Source: PubMed Central journal article supplement (PMC8326439)
Supplement: sj-pdf-1-ebm-10.1177_15353702211008641.pdf [file sj-pdf-1-ebm-10.1177_15353702211008641.pdf]

# New Insights into Hallux Valgus by Whole Exome Sequencing Study

Jun Jia <sup>1,#</sup>, Junyi Li <sup>2,#</sup>, Huiqi Qu <sup>3,#</sup>, Mengyu Li <sup>2</sup>, Sipeng Zhang <sup>2</sup>, Jun Hao <sup>4</sup>, Xinyi Gao <sup>2</sup>, Xinyi Meng <sup>2</sup>, Yan Sun <sup>2</sup>, Hakon Hakonarson <sup>3,5,6</sup>, Xiantie Zeng <sup>1,\*</sup>, Qianghua Xia <sup>2,\*</sup>, Jin Li <sup>2,\*</sup>

## Supplementary Materials:

**Figure S1:** the pipeline of WES data analyses.

**Figure S2:** the appearance of the feet of family members of family 1.

**Figure S3:** the appearance of the feet of family members of family 2.

**Figure S4:** the appearance of the feet of family members of family 3.

**Figure S5:** digital radiography of proband (II-1) in family 1.

**Figure S6:** digital radiography of proband (I-2) in family 2.

**Figure S7:** digital radiography of proband (II-1) in family 3.

**Table S1:** PCR primers for Sanger sequencing.

**Table S2:** the sequencing coverage quality parameters of each sample.

**Supplementary Figure 1.** The pipeline of whole exome sequencing data analyses.

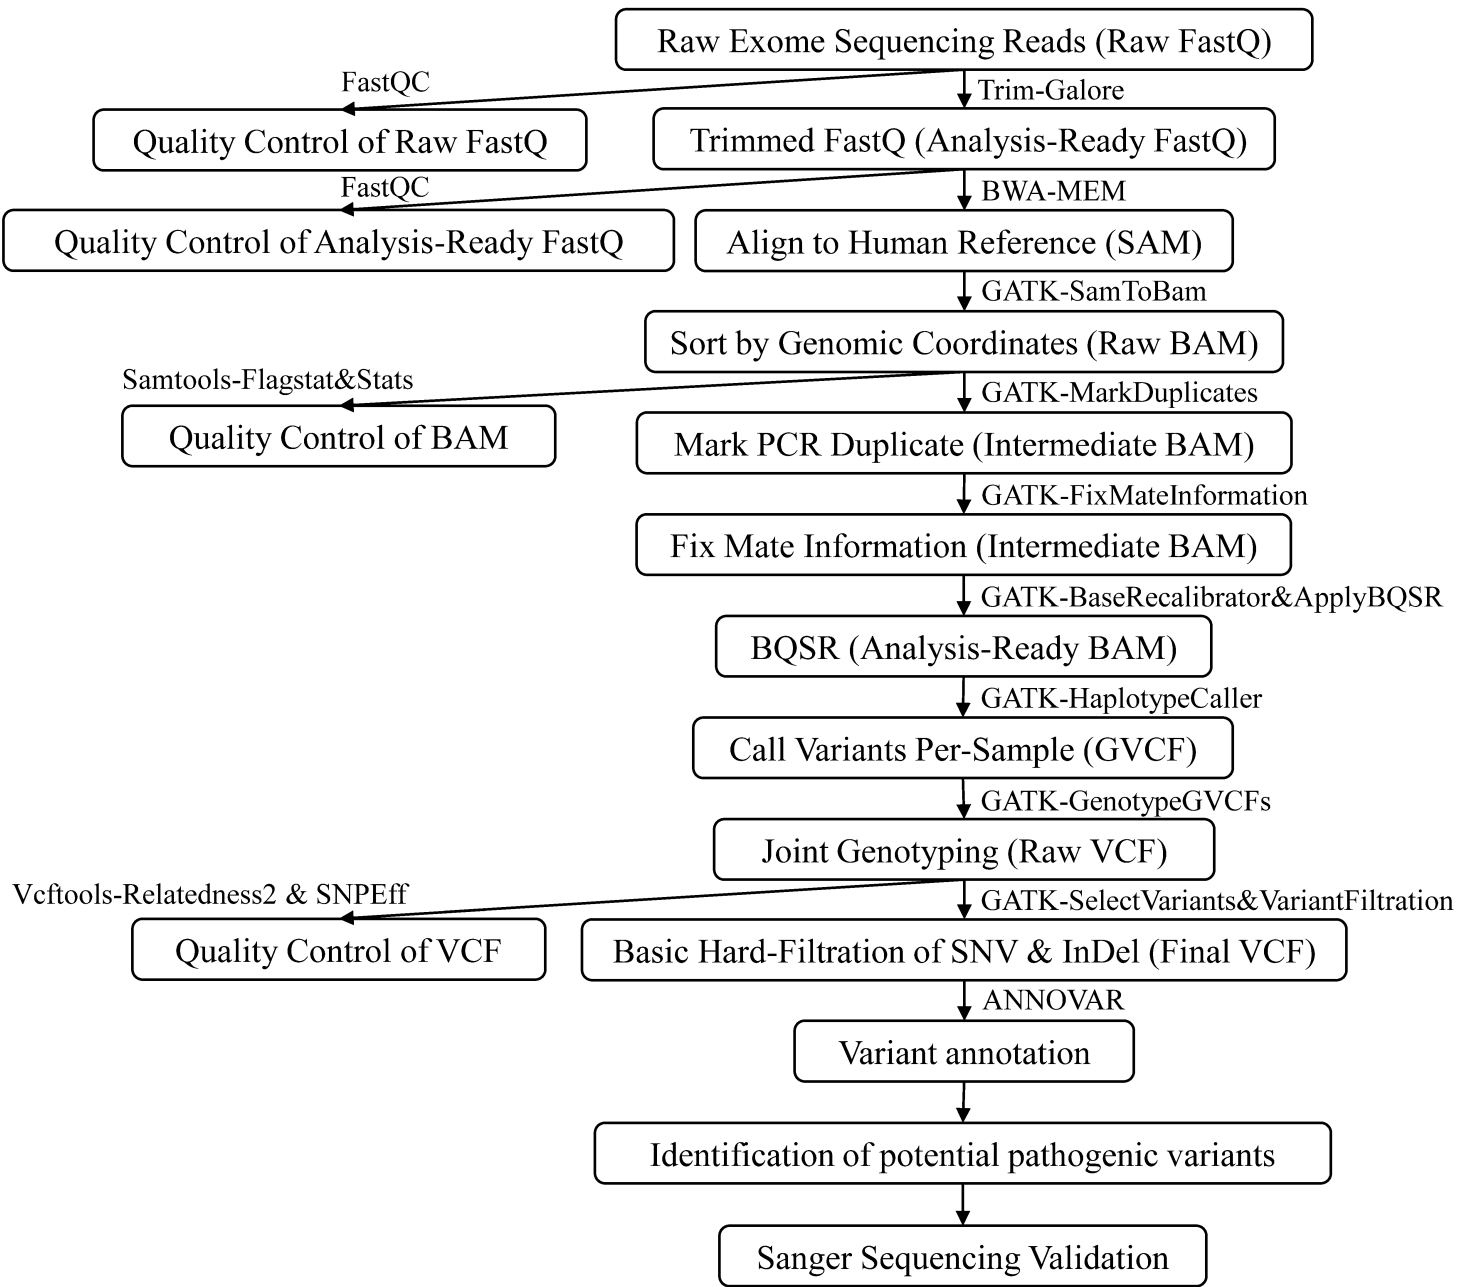

This diagram shows the general processing flow of the whole exome sequencing data of hallux valgus families. The main purpose of each step is described in the rounded rectangle, and the format of the data generated in the corresponding step is listed in the parenthesis. The software or tool used in each step is marked next to the single-line arrow.



**Supplementary Figure 2.** The appearance of the feet of family members of family 1.

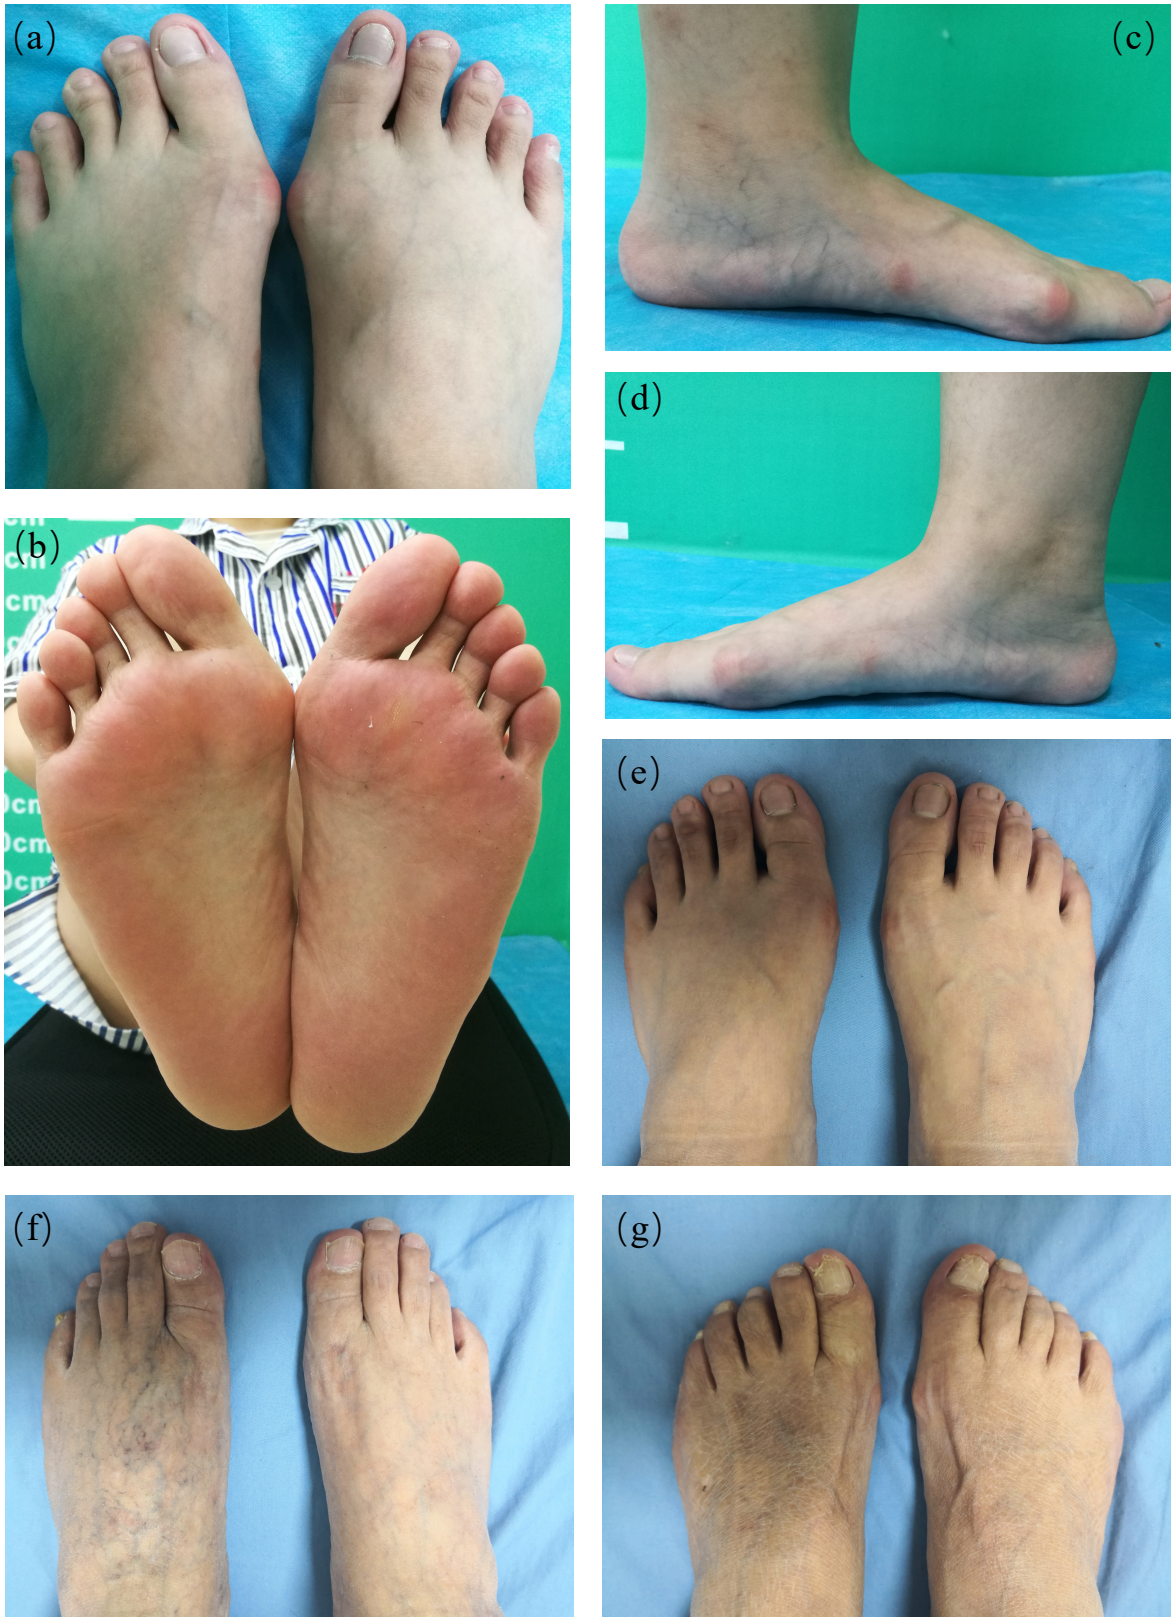

**(a-d)** II-1 (proband); **(e)** II-2 (proband's sister); **(f)** I-1 (proband's father); **(g)** I-2 (proband's mother).



**Supplementary Figure 3.** The appearance of the feet of family members of family 2.

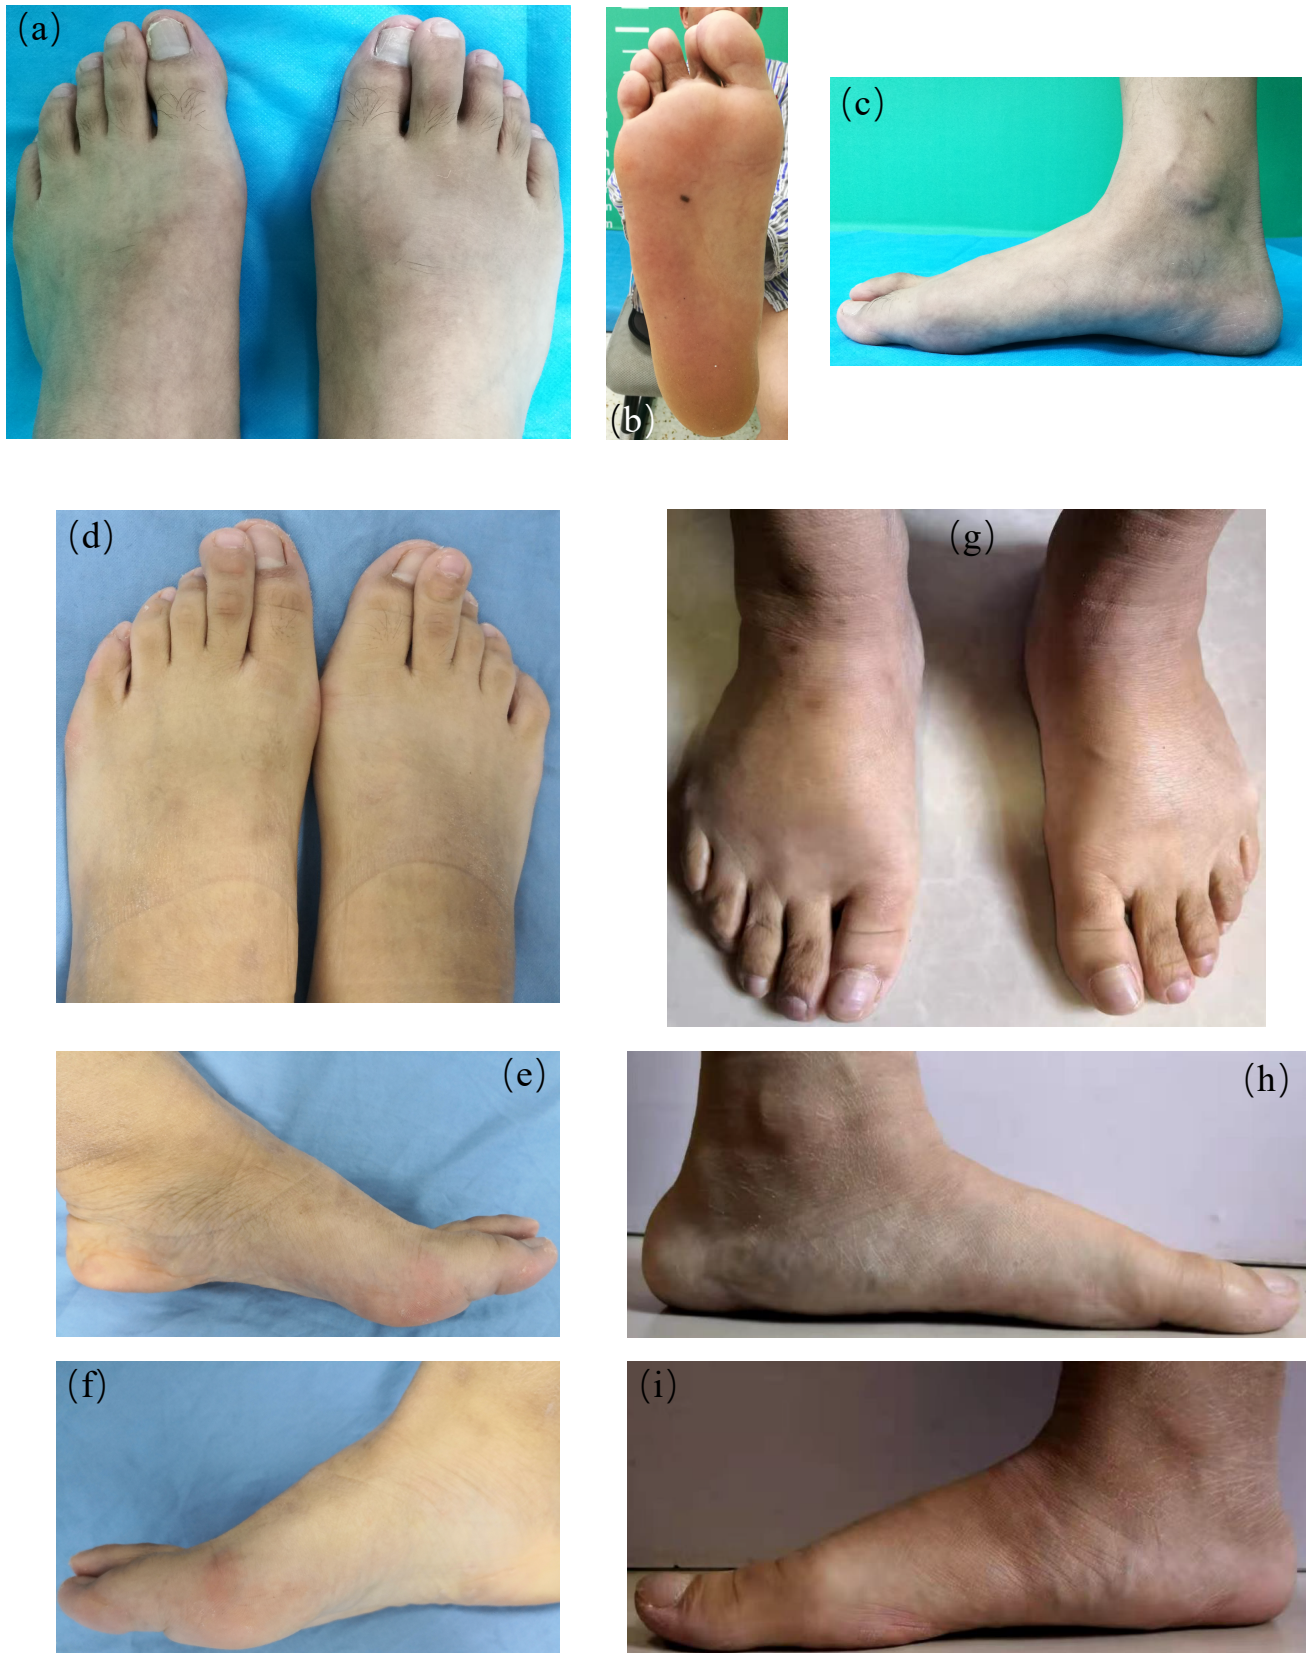

**(a-c)** I-2 (proband); **(d-f)** II-1 (proband's daughter); **(g-i)** I-1 (proband's wife).



**Supplementary Figure 4.** The appearance of the feet of family members of family 3.

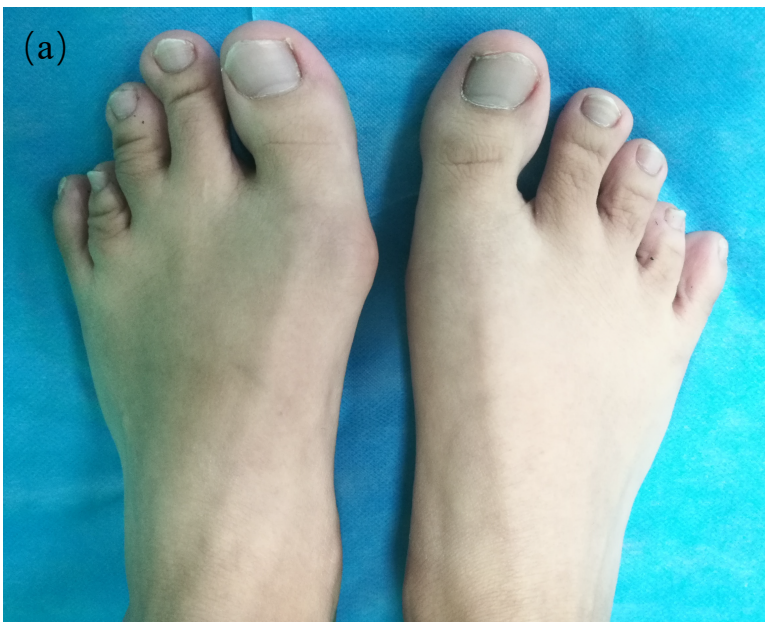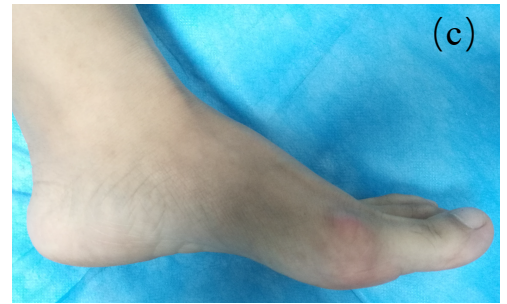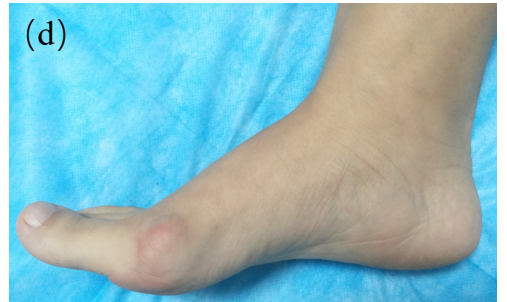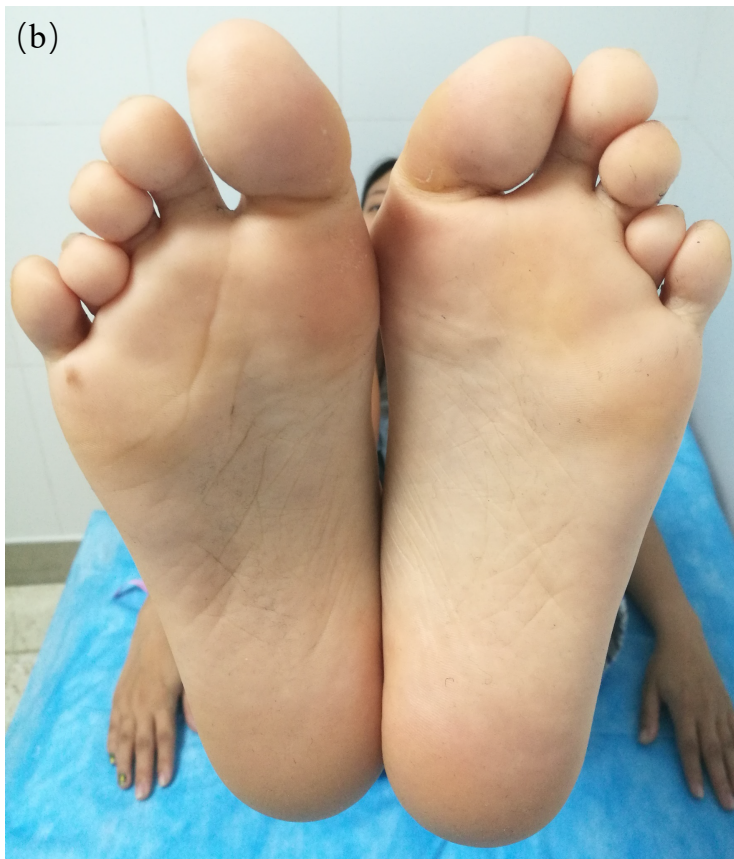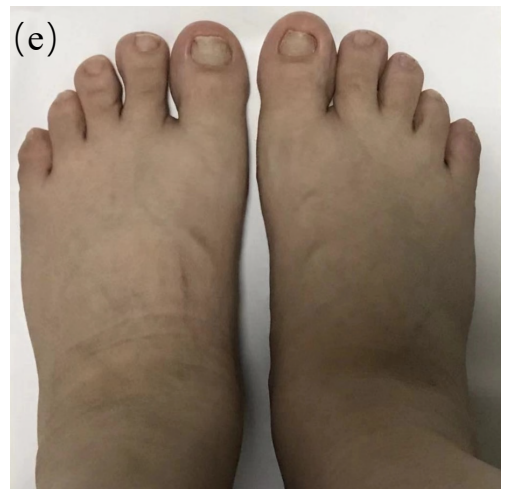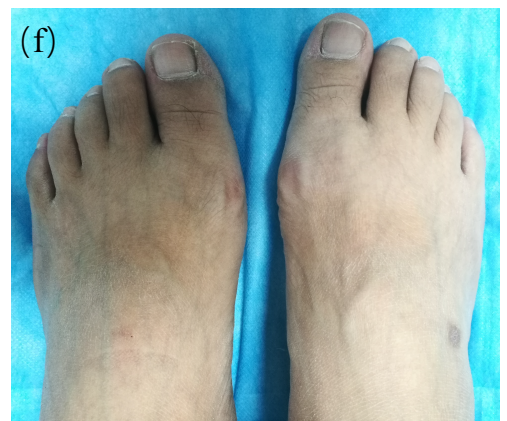

**(a-d)** II-1 (proband); **(e)** I-1 (proband's mother); **(f)** I-2 (proband's father).

**Supplementary Figure 5.** Digital radiography of proband (II-1) in family 1.

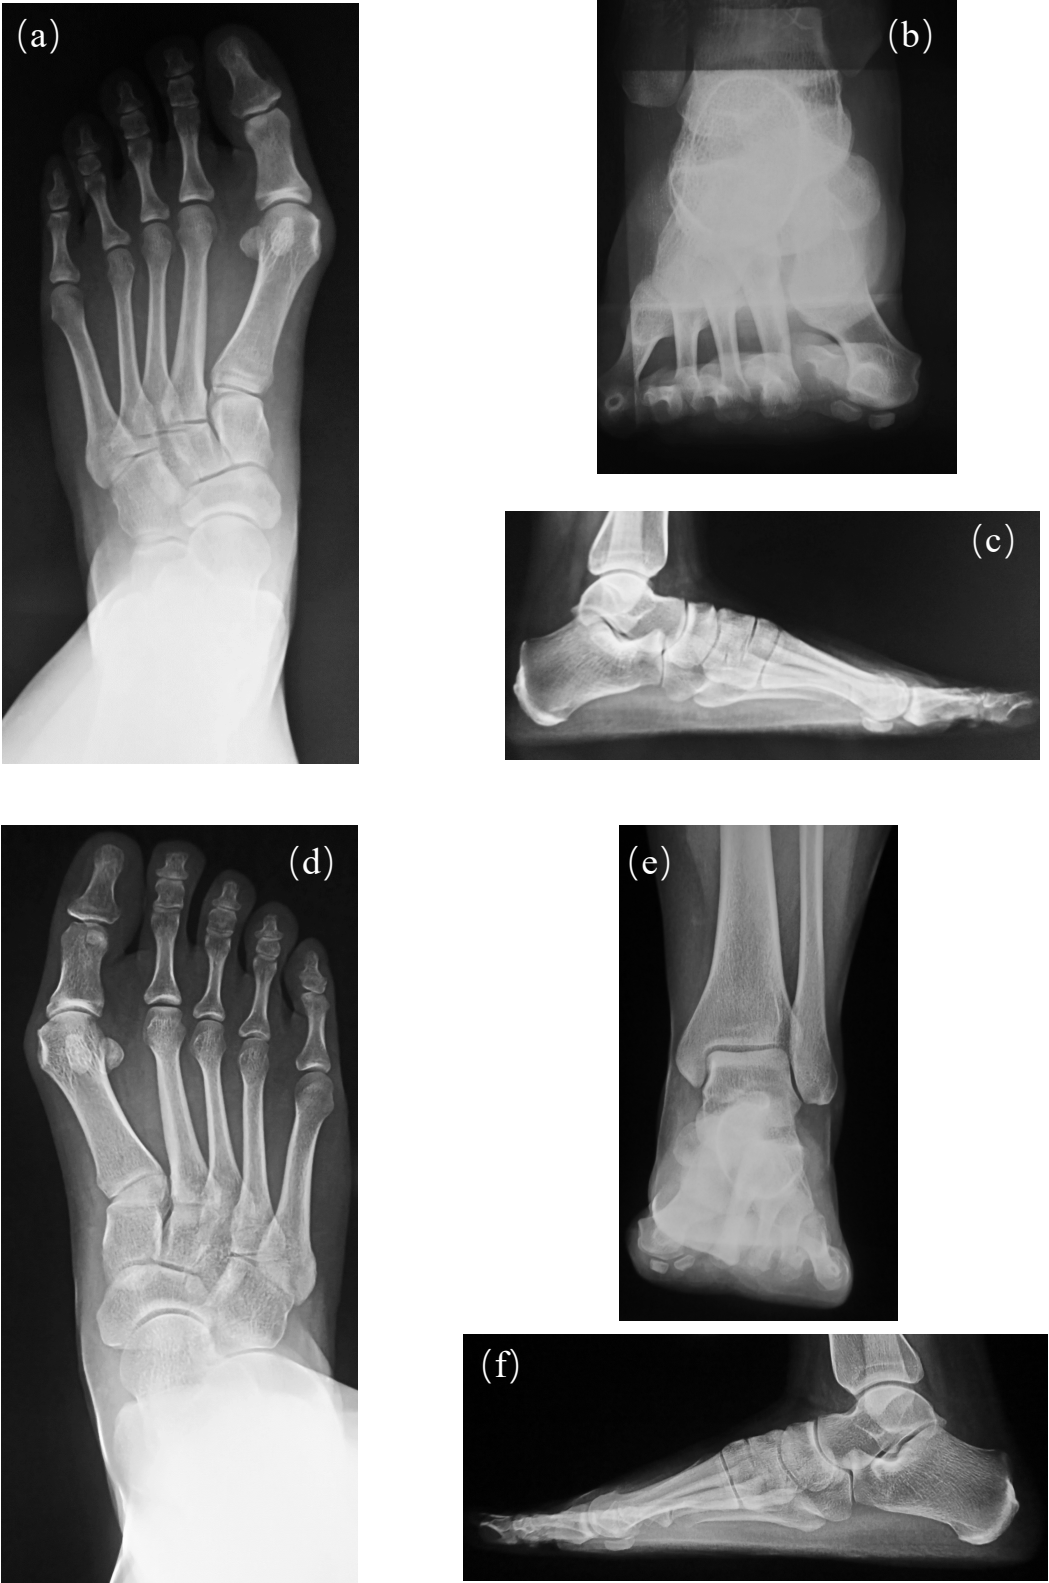

**(a-c)** frontal, axial, and lateral films of the left foot;  
**(d-f)** frontal, axial, and lateral films of the right foot.

**Supplementary Figure 6.** Digital radiography of proband (I-2) in family 2.

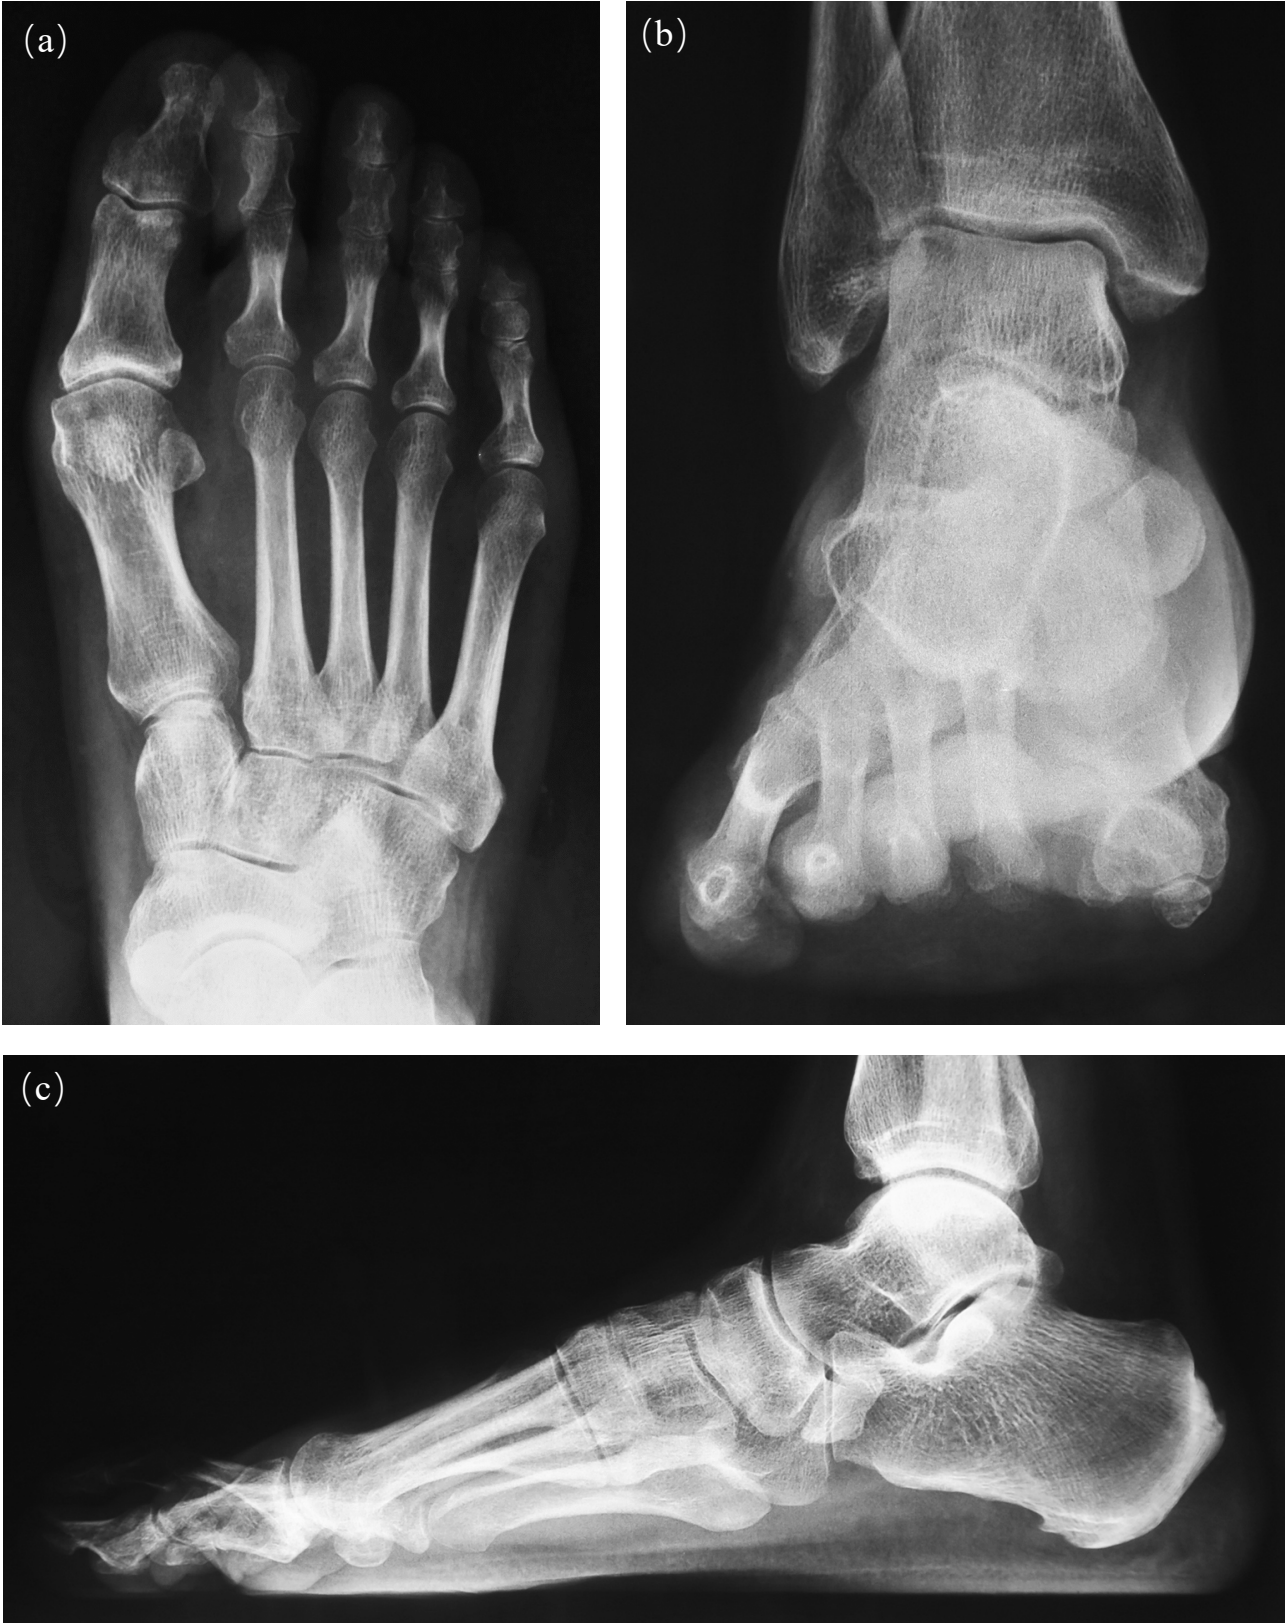

**(a-c)** frontal, axial, and lateral films of the right foot.



Supplementary Figure 7. Digital radiography of proband (II-1) in family 3.

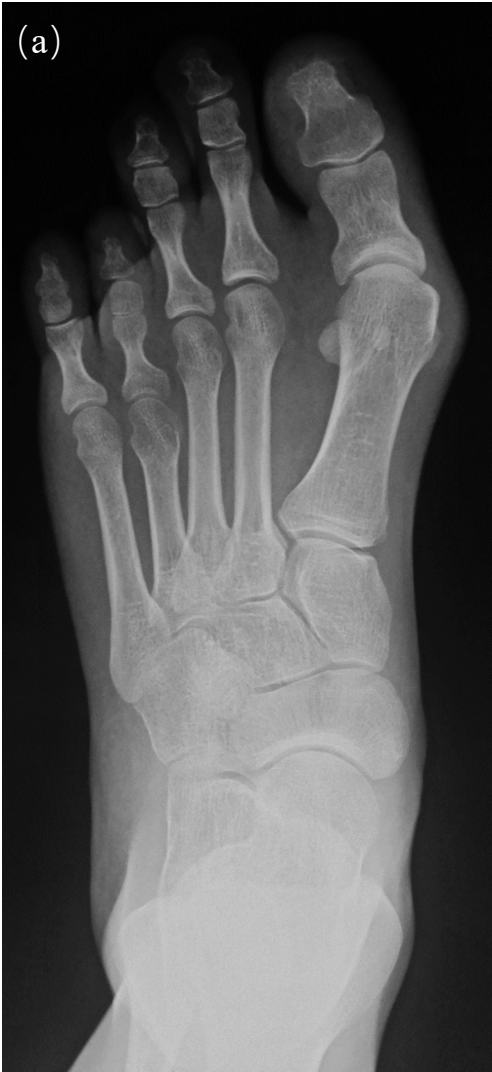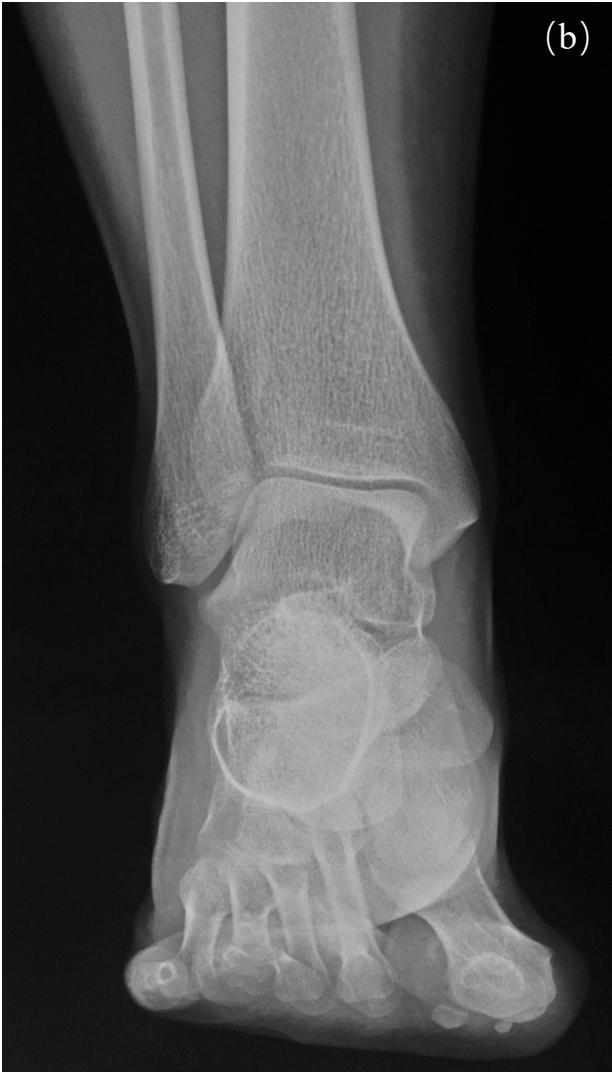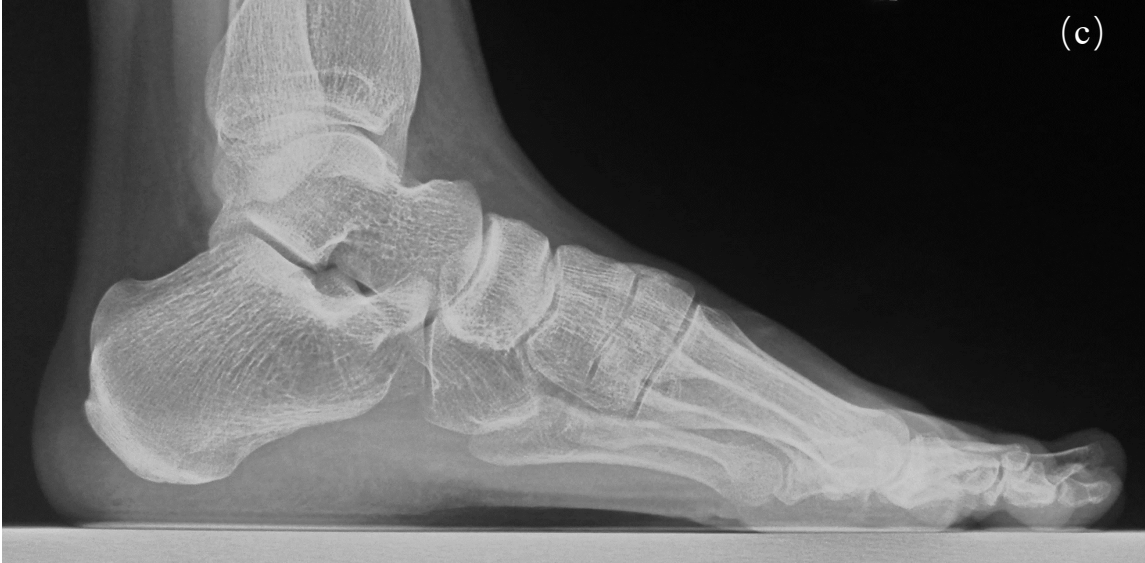

(a-c) frontal, axial, and lateral films of the left foot.

**Supplementary Table 1.** PCR primers for Sanger sequencing.

| Genomic coordinates | Product length | Forward primer 5'→3'  | Reverse primer 5'→3' |
|---------------------|----------------|-----------------------|----------------------|
| Chr5:40958328       | 389bp          | ACCTGAAATGGGCTCTTGAA  | GCACAGTGGGGCTGTTACTT |
| Chr2:179482520      | 397bp          | AGGCACAGTCTGGGTTTCTAA | TCTCACTGACATGGGAACCA |
| Chr2:238258801      | 386bp          | ACCTCTCTACCCCTGCCAAT  | TTCCACCGAAATCTCAAAGG |
| Chr5:145499963      | 359bp          | GCCACAGAGTCCCAAAAAGA  | TTCTCCTCCCTCAGCAGTA  |
| Chr6:110062680      | 463bp          | GCTGCACTGCAATTCTGAAG  | TGGATTTTGGATGGGAAGAG |
| Chr21:44486410      | 464bp          | GGAAGCTAGGTTGGGACACA  | GTGTAGGGGAGGTGAGTGA  |

**Supplementary Table 2.** The sequencing coverage quality parameters of each sample.

| Sample Name    | % GC         | Ins.Size     | >= 1X         | >= 5X         | >= 10X        | >= 30X        | >= 50X        | Median cov    | Mean cov      | % Aligned    | M Aligned     | M Total reads | % Error      |
|----------------|--------------|--------------|---------------|---------------|---------------|---------------|---------------|---------------|---------------|--------------|---------------|---------------|--------------|
| <b>F1-I-1</b>  | 49%          | 170          | 99.8%         | 99.7%         | 99.4%         | 97.0%         | 91.8%         | 138X          | 42.9X         | 99.9%        | 109.7         | 109.9         | 0.26%        |
| <b>F1-I-2</b>  | 49%          | 173          | 99.6%         | 99.3%         | 98.6%         | 91.4%         | 77.2%         | 82X           | 25.6X         | 99.9%        | 66.3          | 66.4          | 0.26%        |
| <b>F1-II-1</b> | 49%          | 180          | 99.6%         | 99.5%         | 99.4%         | 98.1%         | 95.2%         | 171X          | 53.9X         | 99.9%        | 133.1         | 133.3         | 0.26%        |
| <b>F1-II-2</b> | 49%          | 176          | 99.6%         | 99.5%         | 99.4%         | 98.3%         | 96.1%         | 190X          | 59.9X         | 99.9%        | 150.7         | 150.9         | 0.25%        |
| <b>F2-I-1</b>  | 49%          | 185          | 99.6%         | 99.4%         | 99.1%         | 95.8%         | 88.3%         | 113X          | 35.4X         | 99.9%        | 88.2          | 88.4          | 0.25%        |
| <b>F2-I-2</b>  | 50%          | 192          | 99.9%         | 99.7%         | 99.5%         | 97.7%         | 93.6%         | 150X          | 47.2X         | 99.9%        | 118.0         | 118.1         | 0.27%        |
| <b>F2-II-1</b> | 49%          | 186          | 99.7%         | 99.5%         | 99.2%         | 96.9%         | 91.7%         | 134X          | 42.0X         | 99.9%        | 107.8         | 107.9         | 0.24%        |
| <b>F3-I-1</b>  | 50%          | 174          | 99.6%         | 99.5%         | 99.3%         | 97.6%         | 94.0%         | 160X          | 50.1X         | 99.8%        | 126.3         | 126.5         | 0.26%        |
| <b>F3-I-2</b>  | 45%          | 171          | 99.8%         | 99.5%         | 98.5%         | 86.4%         | 66.6%         | 67X           | 20.4X         | 100.0%       | 69.4          | 69.4          | 0.30%        |
| <b>F3-II-1</b> | 50%          | 190          | 99.6%         | 99.5%         | 99.4%         | 98.4%         | 96.1%         | 189X          | 59.9X         | 99.9%        | 145.8         | 146.0         | 0.27%        |
| <b>Average</b> | <b>48.9%</b> | <b>179.7</b> | <b>99.68%</b> | <b>99.51%</b> | <b>99.18%</b> | <b>95.76%</b> | <b>89.06%</b> | <b>139.4X</b> | <b>43.73X</b> | <b>99.9%</b> | <b>111.53</b> | <b>111.68</b> | <b>0.26%</b> |

%GC = mean GC content; Ins.Size = median insert size; >=nX = fraction of genome with at least nX coverage; Median cov = median coverage; Mean cov = mean coverage; % Aligned = % mapped reads; M Aligned = number of mapped reads (millions); M Total reads = number of reads (millions); Error rate = alignment error rate (i.e. total edit distance over the number of mapped bases).
